# Supplementary material for: Mechanical study of a copper dietary supplement, copper glycinate hydrate
Source: Royal Society of Chemistry journal article supplement (doi:10.1039/d0ce01706j), 2021-01-01
Supplement: d0ce01706j1.pdf [file d0ce01706j1.pdf]

## Supporting information

### Mechanical Properties of a Copper Dietary Supplement, Copper Glycinate Hydrate

*Muhammad Azeem,<sup>a</sup> Li Kai,<sup>a</sup> Yan Qin,<sup>b</sup> Liyuan Dong,<sup>b</sup> Wei Li,<sup>\*a</sup>*

<sup>a</sup>School of Materials Science and Engineering & Tianjin Key Laboratory of Metal and Molecule-Based Material Chemistry, Nankai University, Tianjin 300350, China

<sup>b</sup>School of Physics, Huazhong University of Science and Technology, Wuhan 430074, China

These authors contributed equally: Muhammad Azeem, Kai Li

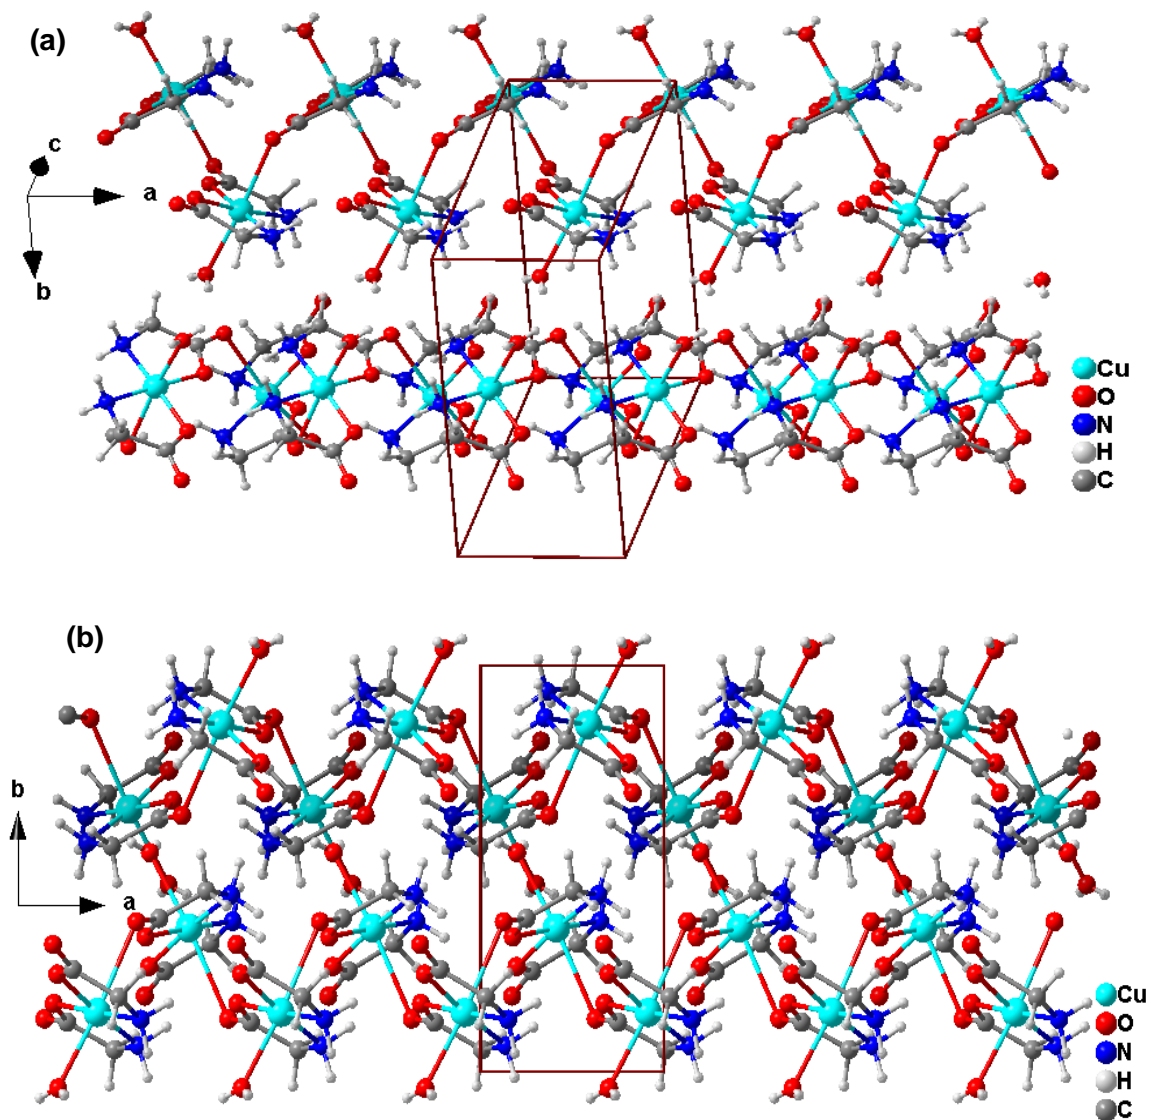

**Fig. S1.** Crystal structure of Cu-Gly. (a) The chains view in  $abc$ -plane while chains extending to  $a$ -axis. (b) The chains view in  $ab$ -plane while chains extending to  $a$ -axis. Color scheme: Cu, Turquoise; O, red; C, gray-40%; N, blue and H, gray-25%

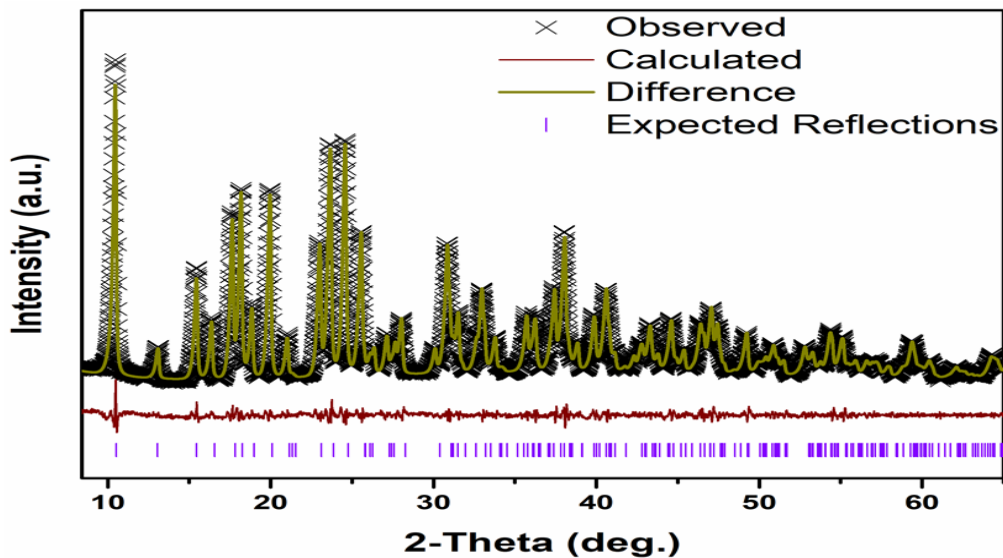

**Fig. S2.** The patterns of Cu-Gly refined using Le Bail method to indicate its purity at ambient conditions. Black crosses: observed X-ray powder diffraction, Wine line: calculated profile; Greenish yellow line: the difference between observed data and calculated profile. The Purple vertical markers indicate the allowed Bragg reflections. The cell parameters were determined to be  $a = 5.229(3) \text{ \AA}$ ,  $b = 10.823(6) \text{ \AA}$ ,  $c = 13.507(9) \text{ \AA}$ ,  $V = 764.6(8) \text{ \AA}^3$ .

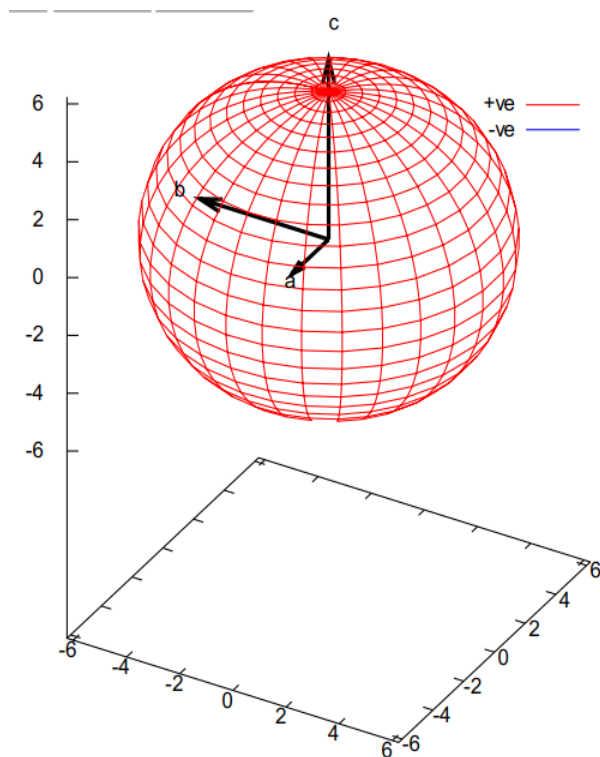

**Fig. S3.** The compressibility indicatrix for pressure range (0–13.65 GPa), while the magnitudes of corresponding compressibility  $K_{X1}$ ,  $K_{X2}$  and  $K_{X3}$  are mentioned. The red values correspond to positive linear compressibility (PLC) and blue shows negative linear compressibility (NLC).

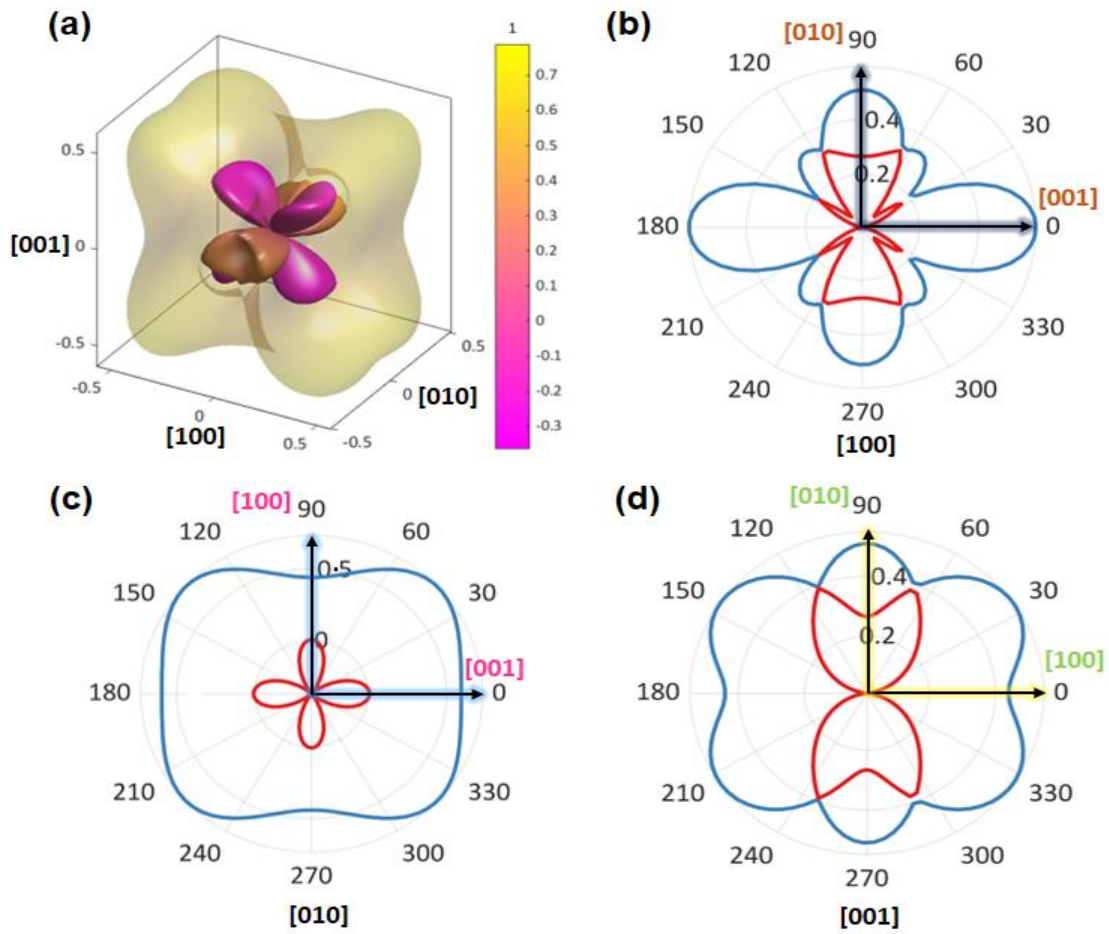

**Fig. S4.** Surface contours of direction dependent Poisson's ratios: (a) 3D view; (b) 2D view projected normal to the  $(100)$  plane. (c) 2D view projected normal to the  $(010)$  plane. (d) 2D view projected normal to the  $(001)$  plane.

**Table S1.** The elastic moduli ( $E$ ) and Poisson's ratios ( $\nu$ ) extracted from the DFT calculation results.

| Elastic modulus |       | Shear modulus |            |            | Poisson's ratios |       |           |       |
|-----------------|-------|---------------|------------|------------|------------------|-------|-----------|-------|
| $E$ (GPa)       |       | $G$ (GPa)     |            |            | $\nu$            |       |           |       |
| direction       | value | direction     | max. value | min. value | direction        | value | direction | value |
| x               | 26.28 | [100]         | 23.30      | 4.54       | xy               | 0.44  | xz        | 0.01  |
| y               | 15.86 | [010]         | 16.75      | 4.54       | yx               | 0.27  | yz        | 0.51  |
| z               | 18.52 | [001]         | 23.30      | 16.75      | zx               | 0.007 | zy        | 0.59  |

**Table S2.** Principal compressibilities and corresponding principal axes were determined using the PASCAL software for Cu-Gly.

| Principal axis, $i$ | $K_{xi}$ (TPa <sup>-1</sup> ) | Component of $\chi_i$ along the crystallographic axes |         |        | Approximate axis |
|---------------------|-------------------------------|-------------------------------------------------------|---------|--------|------------------|
|                     |                               | $a$                                                   | $b$     | $c$    |                  |
| 1                   | 6.23                          | 0.0000                                                | -1.0000 | 0.0000 | [010]            |
| 2                   | 6.13                          | -1.0000                                               | 0.0000  | 0.0000 | [100]            |
| 3                   | 5.10                          | 0.0000                                                | 0.0000  | 1.0000 | [001]            |

**Table S3.** The experimental results of compressibility  $K_{X1}$ ,  $K_{X2}$  and  $K_{X3}$  as a function of pressure.

| Pressure (GPa) | Compressibility (TPa <sup>-1</sup> ) |          |          |
|----------------|--------------------------------------|----------|----------|
|                | $K_{X1}$                             | $K_{X2}$ | $K_{X3}$ |
| 0.00           | ----                                 | ----     | ----     |
| 0.30           | 27.90                                | 14.54    | 12.93    |
| 0.43           | 22.76                                | 12.93    | 11.39    |
| 0.58           | 19.09                                | 11.68    | 10.21    |
| 0.85           | 15.28                                | 10.28    | 8.90     |
| 1.36           | 11.64                                | 8.79     | 7.52     |
| 2.09           | 9.11                                 | 7.63     | 6.45     |
| 3.15           | 7.19                                 | 6.65     | 5.57     |
| 4.03           | 6.23                                 | 6.13     | 5.10     |
| 5.03           | 5.49                                 | 5.69     | 4.71     |
| 6.92           | 4.57                                 | 5.12     | 4.21     |
| 7.99           | 4.20                                 | 4.88     | 4.00     |
| 9.37           | 3.83                                 | 4.63     | 3.77     |
| 13.25          | 3.14                                 | 4.13     | 3.33     |

**Table S4.** The lattice parameters of Cu-Gly under different pressures extracted from HP-PXRD experiments.

| <b>P (GPa)</b> | <b><i>a</i> (Å)</b> | <b><i>b</i> (Å)</b> | <b><i>c</i> (Å)</b> | <b><i>V</i> (Å<sup>3</sup>)</b> |
|----------------|---------------------|---------------------|---------------------|---------------------------------|
| 0.00           | 5.229(4)            | 10.823(10)          | 13.507(23)          | 764.4(6)                        |
| 0.30           | 5.204(5)            | 10.723(13)          | 13.477(23)          | 752.2(7)                        |
| 0.43           | 5.196(4)            | 10.673(13)          | 13.467(24)          | 747.0(7)                        |
| 0.58           | 5.187(4)            | 10.632(12)          | 13.436(24)          | 741.1(7)                        |
| 0.85           | 5.159(5)            | 10.510(11)          | 13.424(26)          | 727.9(7)                        |
| 1.36           | 5.144(5)            | 10.429(14)          | 13.351(29)          | 716.3(10)                       |
| 2.09           | 5.126(4)            | 10.354(11)          | 13.311(33)          | 706.5(10)                       |
| 3.15           | 5.089(6)            | 10.252(17)          | 13.208(43)          | 689.3(17)                       |
| 4.03           | 5.050(5)            | 10.180(17)          | 13.093(52)          | 673.2(20)                       |
| 5.03           | 5.028(7)            | 10.123(18)          | 12.955(54)          | 659.5(21)                       |
| 6.92           | 4.998(7)            | 10.072(21)          | 12.789(43)          | 643.9(17)                       |
| 7.99           | 4.980(8)            | 10.033(23)          | 12.718(46)          | 635.6(19)                       |
| 9.37           | 4.949(10)           | 9.976(33)           | 12.602(48)          | 622.3(24)                       |
| 13.25          | 4.900(17)           | 9.862(62)           | 12.470(50)          | 602.6(40)                       |
